# Supplementary material for: An association study between USP34 and polycystic ovary syndrome
Source: PubMed Central journal article supplement (PMC4435648; doi:10.1186/s13048-015-0158-y), 2015-05-15
Supplement: 13048_2015_158_MOESM1_ESM.pdf [file 13048_2015_158_MOESM1_ESM.pdf]

## Additional file 1

**Table S1: GWAS database of *USP34***

| SNP               | Allele | F_A     | F_U     | CHISQ  | P               |
|-------------------|--------|---------|---------|--------|-----------------|
| rs777587          | G/A    | 0.3014  | 0.2732  | 3.086  | 0.07898         |
| rs4671398         | A/G    | 0.2545  | 0.2392  | 0.9981 | 0.3178          |
| rs11889205        | A/G    | 0.01448 | 0.01134 | 0.625  | 0.4292          |
| rs2290324         | C/A    | 0.3971  | 0.3719  | 2.139  | 0.1436          |
| rs13388389        | C/A    | 0.01379 | 0.01134 | 0.3903 | 0.5321          |
| rs7591772         | G/C    | 0.3029  | 0.2716  | 3.742  | 0.05308         |
| rs17007356        | A/C    | 0.3012  | 0.3611  | 12.79  | <b>3.49E-04</b> |
| rs2167565         | C/T    | 0.2462  | 0.2333  | 0.7331 | 0.3919          |
| rs10496091        | T/C    | 0.01655 | 0.0119  | 1.245  | 0.2645          |
| rs2167566         | G/T    | 0.3953  | 0.3688  | 2.367  | 0.1239          |
| <b>rs17008097</b> | G/C    | 0.2983  | 0.3576  | 12.47  | <b>4.14E-04</b> |
| rs12622458        | C/A    | 0.399   | 0.3697  | 2.881  | 0.08962         |
| rs2600672         | A/G    | 0.3946  | 0.3622  | 3.541  | 0.05989         |
| rs2694619         | C/T    | 0.2993  | 0.2775  | 1.836  | 0.1755          |
| rs2694618         | G/A    | 0.3022  | 0.2766  | 2.533  | 0.1115          |
| rs17482440        | C/T    | 0.3024  | 0.2768  | 2.521  | 0.1123          |
| rs778157          | C/G    | 0.3968  | 0.3683  | 2.73   | 0.09851         |
| rs778160          | G/A    | 0.2764  | 0.2517  | 2.458  | 0.117           |
| rs778143          | A/C    | 0.3947  | 0.3608  | 3.894  | 0.04845         |
| rs1584301         | C/T    | 0.3057  | 0.373   | 16     | <b>6.34E-05</b> |
| rs2694643         | A/G    | 0.3942  | 0.3617  | 3.579  | 0.05852         |
| rs17008755        | C/T    | 0.2967  | 0.3652  | 16.68  | <b>4.43E-05</b> |
| rs10208769        | A/T    | 0.3022  | 0.2713  | 3.727  | 0.05354         |
| <b>rs17008940</b> | T/C    | 0.2766  | 0.343   | 16.33  | <b>5.33E-05</b> |
| rs10496093        | T/C    | 0.281   | 0.3465  | 15.52  | <b>8.15E-05</b> |
| rs812925          | C/G    | 0.203   | 0.186   | 1.475  | 0.2246          |
| rs778139          | A/G    | 0.2167  | 0.197   | 1.863  | 0.1723          |

**P:** p value

**Table S2: Probes and primers of the three SNPs**

| SNPs       | Probes                                                              | Primers                                                     |
|------------|---------------------------------------------------------------------|-------------------------------------------------------------|
| rs17008097 | FAM-TAAGTAGTTTATTTTCAGGACATC-MGB<br>VIC-TAAGTAGTTTATTTGAGGACATC-MGB | F-GCTCCTGGCTTAAAGATTGTTTTT<br>R-TTCATTCATCCTGTAGAGTTCTTTTCG |
| rs17008940 | FAM-ACGGACTAACGTTACTGA-MGB<br>VIC-ACGGACTAACATTACTGAA-MGB           | F-AGGGCAGCCGTTTGTAAAGA<br>R-CCCAGGAAATGCTATAAACATGTTC       |

F: forward; R: reverse

**Table S3 Allele frequencies comparison of *USP34* in four subgroups of PCOS and controls.**

|            |         | Control | HA+OA+PCO   | HA+OA       | HA+ PCO     | OA+PCO      |
|------------|---------|---------|-------------|-------------|-------------|-------------|
|            |         |         | (n=233)     | (n=90)      | (n=10)      | (n=620)     |
| rs17008097 | MAF     | 0.331   | 0.325       | 0.382       | 0.35        | 0.328       |
|            | OR      | -       | 1.03        | 0.80        | 0.92        | 1.01        |
|            | (95%CI) |         | (0.83-1.27) | (0.58-1.10) | (0.36-2.31) | (0.87-1.17) |
| rs17008940 | MAF     | 0.315   | 0.306       | 0.365       | 0.35        | 0.339       |
|            | OR      | -       | 1.05        | 0.80        | 0.85        | 0.90        |
|            | (95%CI) |         | (0.84-1.30) | (0.58-1.10) | (0.34-2.15) | (0.78-1.04) |

HA: hyperandrogenism; OA: oligo-anovulation; PCO: polycystic ovaries; OR: Odd Ratio; CI: Confidence Interval.

**Table S4: Genotype frequencies comparison in PCOS and controls using different genetic models**

| SNP        | Genotype | PCOS        | Control     | P <sub>add</sub> | P <sub>dom</sub> | P <sub>rec</sub> |
|------------|----------|-------------|-------------|------------------|------------------|------------------|
| rs17008097 | CC/GC/GG | 548/531/139 | 484/447/126 | 0.807            | 0.706            | 0.703            |
| rs17008940 | CC/TC/TT | 575/513/130 | 505/438/114 | 0.948            | 0.931            | 0.787            |

P<sub>add</sub>: statistic difference of additive model (the three genotypes, +/+ vs. +/- vs. -/-); P<sub>dom</sub>: dominant model (homozygote of major allele frequency + heterozygote compared with homozygote of minor allele frequency, +/+ plus +/- vs. -/-) of genotype; P<sub>rec</sub>: recessive model (homozygote of minor allele frequency compared with heterozygote+ homozygote of minor allele frequency, +/+ vs. +/- plus -/-) of genotype
